# Supplementary material for: The northern European shelf as an increasing net sink for CO 2
Source: Copernicus journal article supplement (doi:10.5194/bg-18-1127-2021), 2021-02-15
Supplement: Supplementary file [file bg-18-1127-2021-supplement-title-page.pdf › bg-18-1127-2021-supplement-title-page.pdf]

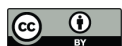

## *Supplement of*

# **The northern European shelf as an increasing net sink for CO<sub>2</sub>**

**Meike Becker et al.**

*Correspondence to:* Meike Becker ([meike.becker@uib.no](mailto:meike.becker@uib.no))

- [bg-18-1127-2021-supplement-title-page.pdf](#)
- [Coefficients MLR1.txt](#)
- [Coefficients MLR2.txt](#)
- [Coefficients MLR3.txt](#)
- [\\_\\_MACOSX](#)
  - [.\\_Coefficients MLR1.txt](#)
  - [.\\_Coefficients MLR2.txt](#)
  - [.\\_Coefficients MLR3.txt](#)

The copyright of individual parts of the supplement might differ from the CC BY 4.0 License.
